# Supplementary material
Source: PubMed Central journal article supplement (PMC2279236)

# The CBS subdomain of inosine 5'-monophosphate dehydrogenase regulates purine nucleotide turnover

M. Pimkin and G.D. Markham

Institute for Cancer Research, Fox Chase Cancer Center, Philadelphia, PA 19111

Address correspondence to: George D. Markham, Institute for Cancer Research, Fox Chase Cancer Center, 333 Cottman Avenue, Philadelphia, PA 19111; Telephone: (215) 728-2439; Fax: (215) 728-3574; E-mail: [gd\\_markham@fccc.edu](mailto:gd_markham@fccc.edu).

## SUPPLEMENTARY MATERIAL

**Figure S1. A ClustalW alignment of *E. coli* BW25113 *guaB*<sup>+</sup>, *E. coli* MP101 *guaB*<sup>ΔCBS</sup> and *Streptococcus pyogenes* IMPDH proteins. Amino acid identities are outlined. The deleted CBS domain sequence is marked with arrows. The “scar” sequence replacing the CBS domain sequence in MP101 is underlined.**

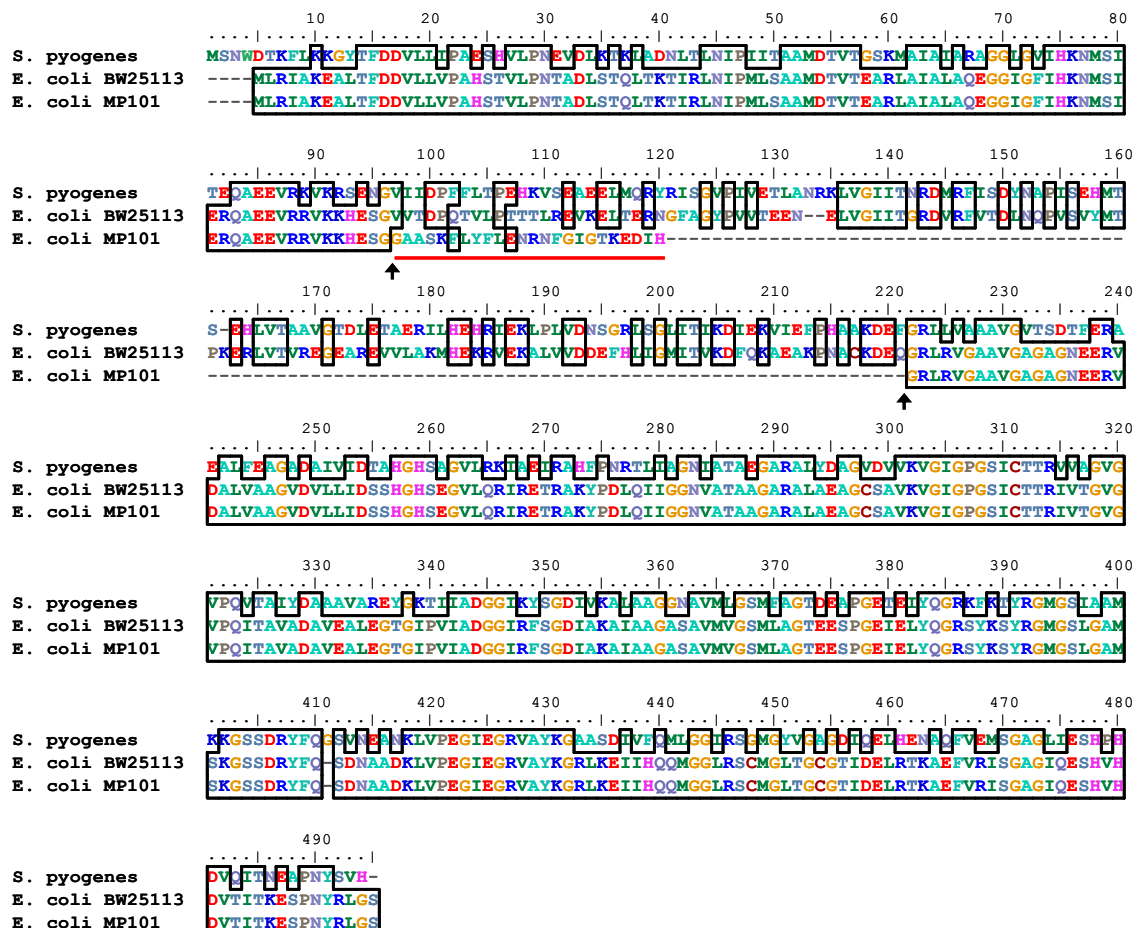

**Figure S2. Cloning of the *guaB*<sup>ACBS</sup> gene in pCR2.1-TOPO vector under the control of a constitutive lacUV5 promoter and native 5'-UTR.** The 5' part of the sequence cloned is presented along with the 5' flanking pCR2.1-TOPO sequence. The forward PCR primer used for gene amplification before TOPO cloning is underlined. The lacUV5 promoter sequence is highlighted.

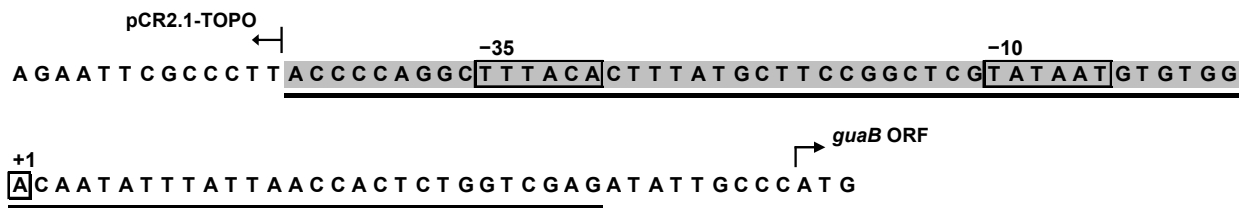

**Figure S3. Growth rates of BW25113 and MP101 with and without guanine supplementation.** BW25113 *guaB*<sup>+</sup> and MP101 *guaB*<sup>ΔCBS</sup> were grown in liquid MOPS culture. Each culture was continuously pumped through a closed circuit system consisting of a 50-ml culture flask and a 1-ml spectrophotometer flow cell. An OD<sub>600</sub> reading was taken every 2 min. 60 μg/ml guanosine was added at the time indicated by the arrow. Guanosine was used in place of guanine due to better solubility.

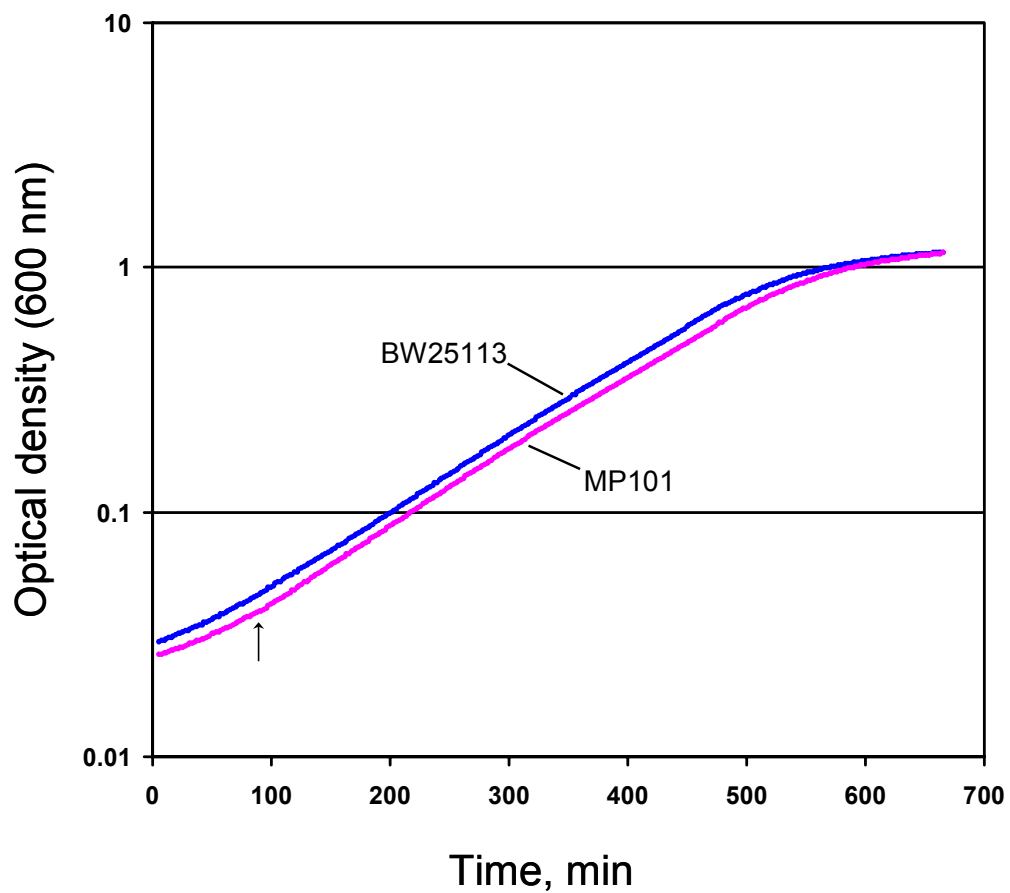

**Figure S4. Responses of the BW25113 *guaB*<sup>+</sup> and MP101 *guaB*<sup>ΔCBS</sup> nucleotide pools to purine bases, nucleosides and inhibitors.** Blue diamonds, ATP; red circles, GTP, green squares, ATP/GTP ratio. The concentrations used were as follows: adenine, 30 μg/ml; hypoxanthine, 30 μg/ml; guanosine, 60 μg/ml; chloramphenicol, 50 μg/ml; decoyinine, 100 μg/ml. Vertical axis, nucleotide pool (mM); horizontal axis, time from base/nucleoside/inhibitor addition (min).

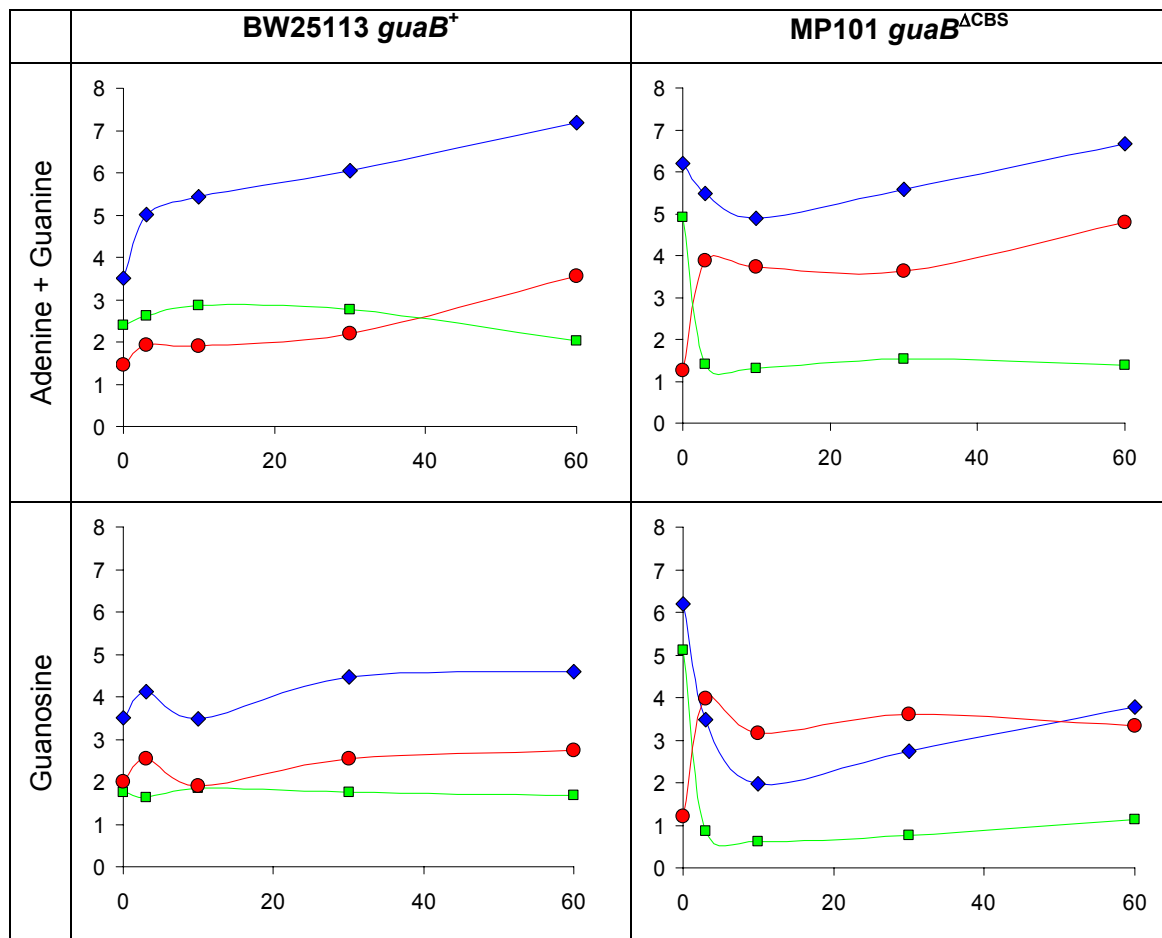

Figure S4, contd.

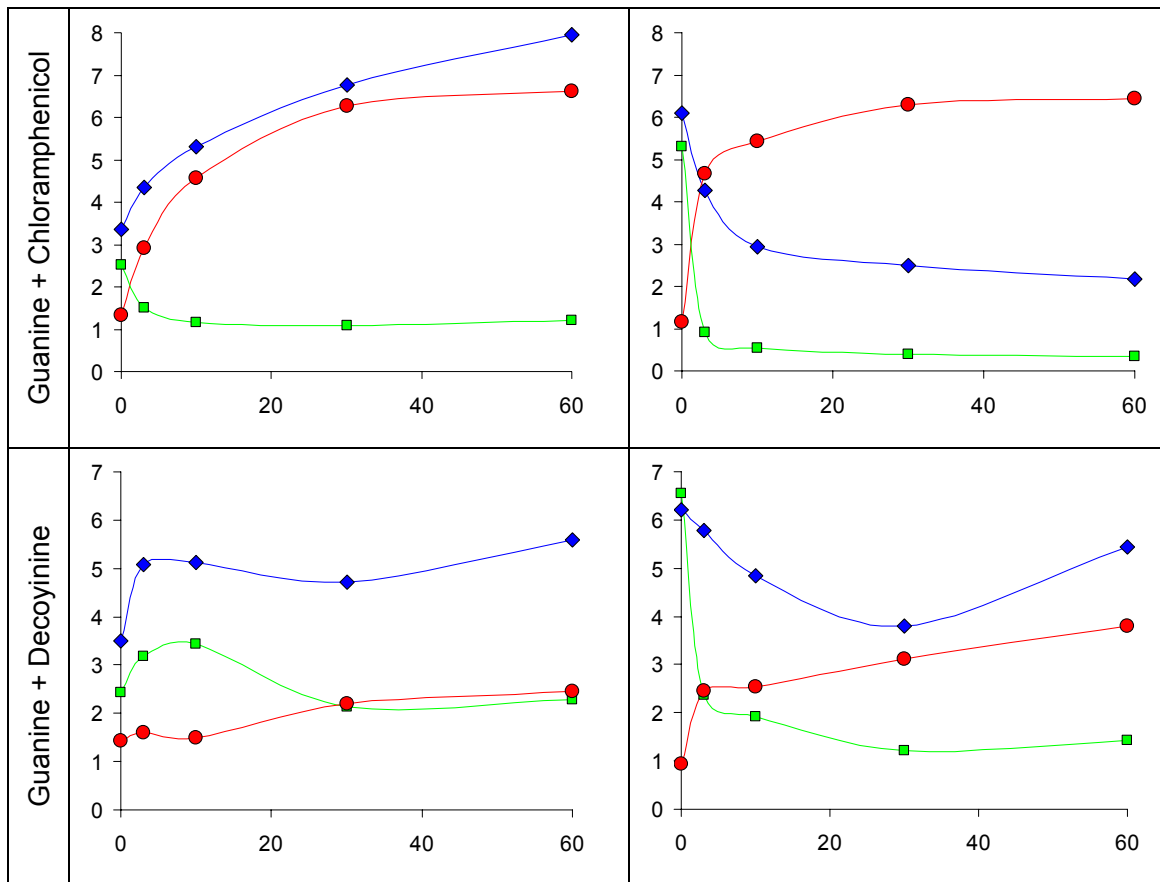

**Figure S5. Complementation of the mutant nucleotide pool phenotype by *guaB*<sup>+</sup> gene present *in trans*.** **A.** Nucleotide pools of MP101/pGUAB (*guaB*<sup>ΔCBS</sup>/*guaB*<sup>+</sup>) and MP101/pGUA4 (*guaB*<sup>ΔCBS</sup>/*guaB*<sup>ΔCBS</sup>) during steady-state growth on MOPS minimal media. **B.** Changes in nucleotide pools induced by addition of 30 μg/ml guanine at 0 min.

**A**

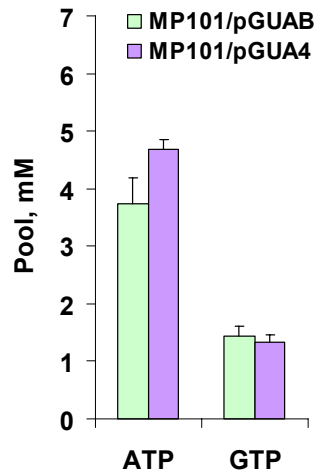

**B**

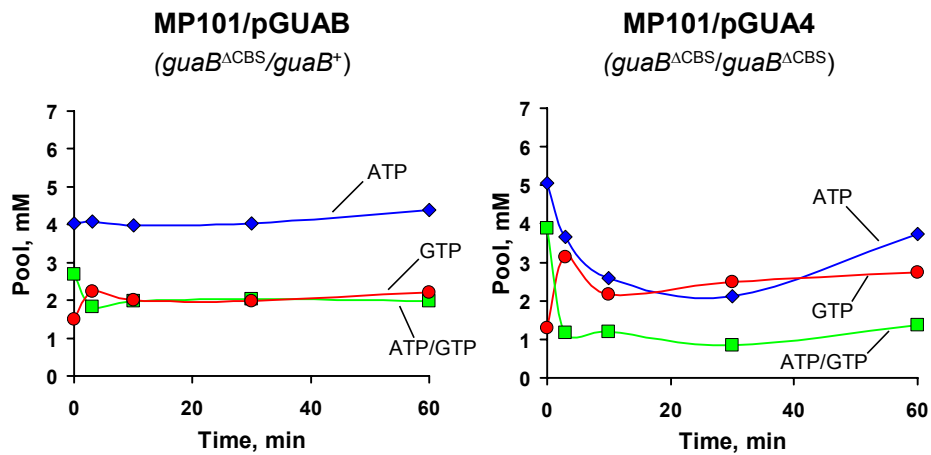

**Figure S6. GMP synthetase activity in crude extracts of BW25113 *guaB*<sup>+</sup> and MP101 *guaB*<sup>ΔCBS</sup> grown on minimal media and supplemented with 10 μg/ml xanthine.** Cells were grown to a mid-exponential phase in minimal MOPS media or MOPS media supplemented with 10 μg/ml xanthine and harvested by centrifugation. BugBuster reagent (Novagen) containing 30 μg/ml PMSF was used for protein extraction (1 ml per 100 OU<sub>600</sub>). The extract was cleared by centrifugation and GMPS activity per mg of protein was measured as described in the *Experimental Procedures* section. GMPS activity is expressed as percent of the activity observed in the BW25113 strain grown on minimal media. An average of 4 measurements is given. Error bars are standard deviations.

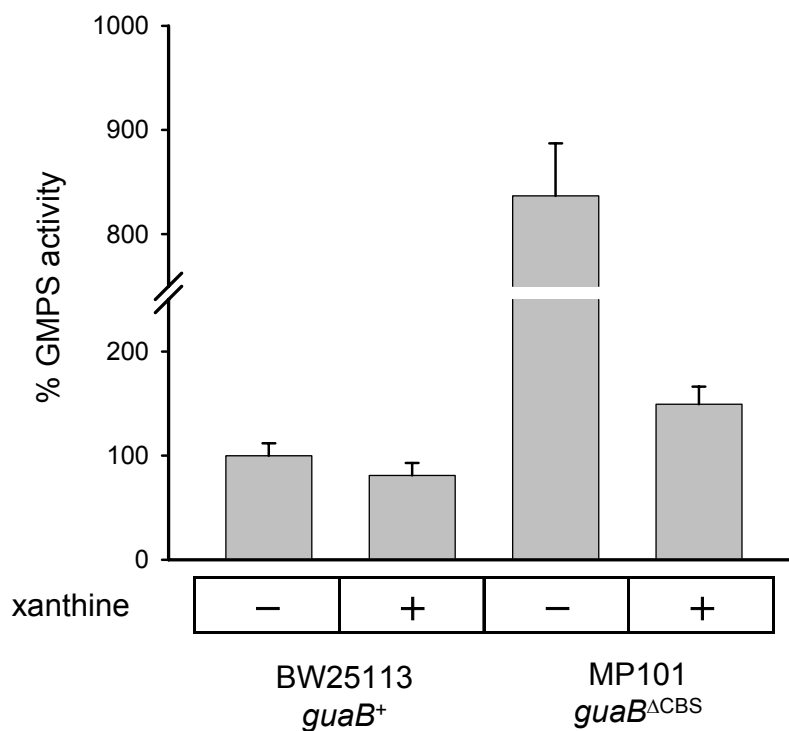

Supplement: NIHMS41068-supplement-Supplementary.pdf [file NIHMS41068-supplement-Supplementary.pdf]
